# Supplementary material for: Users’ Experiences of a Mobile Health Self-Management Approach for the Treatment of Cystic Fibrosis: Mixed Methods Study
Source: PubMed Central journal article supplement (PMC7381063; doi:10.2196/15896), 2020-07-08
Supplement: mhealth_v8i7e15896_app1.pdf [file mhealth_v8i7e15896_app1.pdf]

## Multimedia Appendix 1: Features and screenshots

### MyCyFAPP self-management app

The self-management app targets parents of young children with CF and teenagers with CF. The following features are illustrated through screenshots: summary of today's recorded information; health diary for recording mood and GI symptoms; food diary for food recording and follow-up of food intake; calculation of a personalized enzyme dose depending on meal composition; educational handbook about the disease and the treatment with focus on nutrition.

In addition, other features are supported: access to MyCyFAPP dishes, a compilation of country-specific dishes, created specifically for the app, aiming at correcting specific nutritional imbalances; graphs for visualising the nutritional and health status over time; reminders for medication intake, medical appointments, or any other relevant due task; sharing of recorded data with the Professional Web Tool (PWT); retrieval of information set by HCPs on the PWT: nutritional goals, individual correction factor for the enzyme dose calculation and messages.

### Today's summary

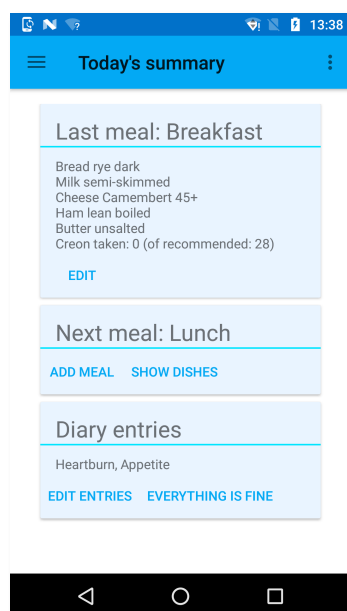

## Health diary: overview and recording example for bowel movement

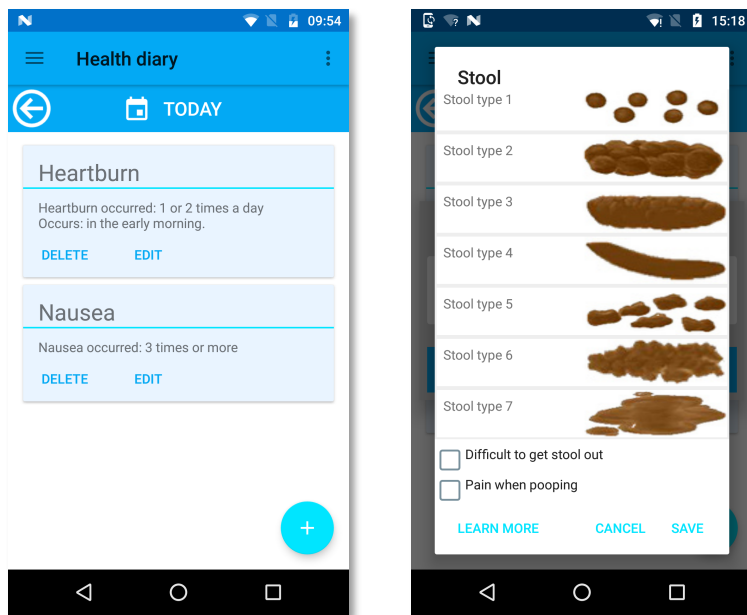

## Food diary: overview, recording a dish and food group classification

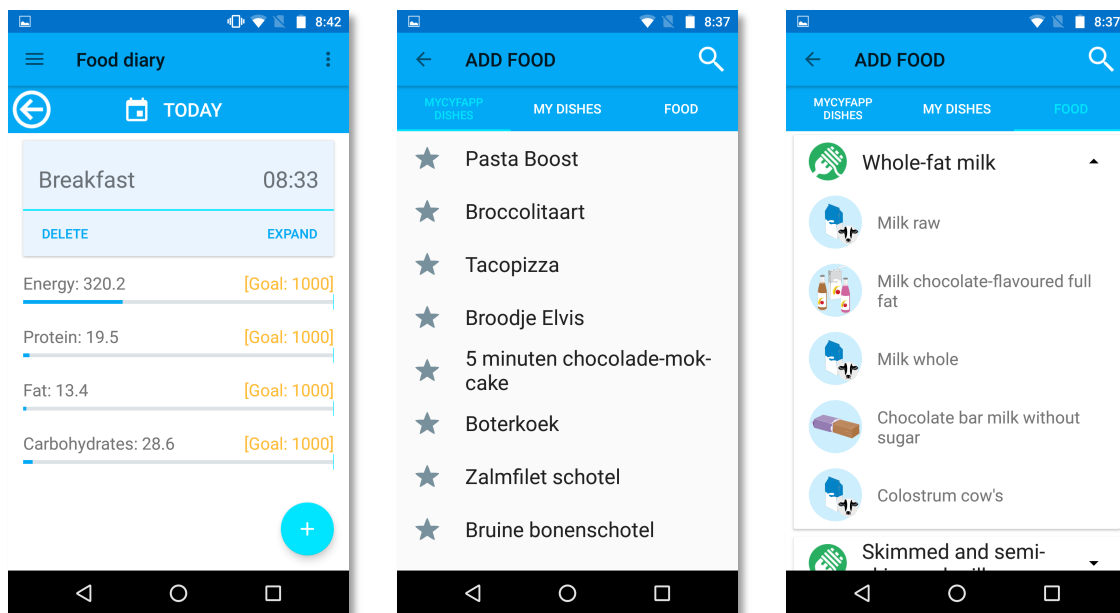

## Enzyme dose recommendation and educational handbook

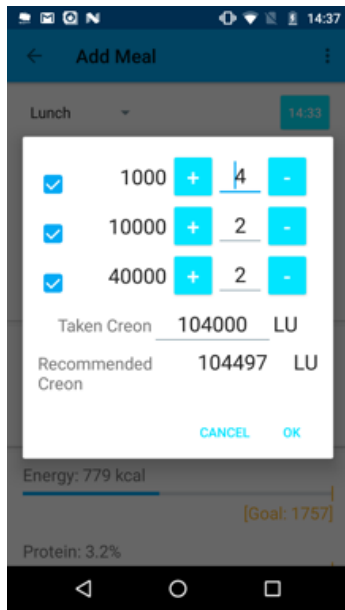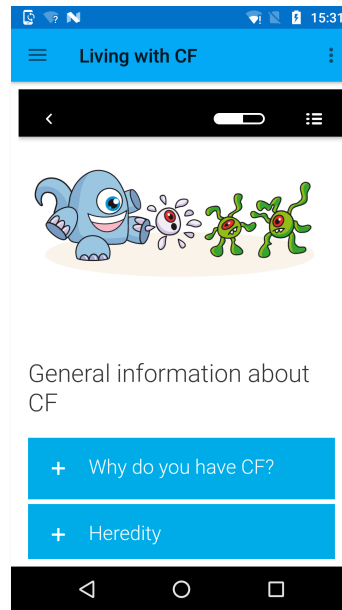

## MyCyFAPP Professional Web Tool

The Professional Web Tool (PWT) targets HCPs. It provides an overview of the progress of the patients, mainly based on the data recorded using the self-management app. Some information is also gathered during consultations, e.g., weight and height. The monitored parameters are those included in CF nutritional guidelines: nutrient intake, enzyme dose and nutritional status. The tool entry point is the patients' list, from where HCPs can get access to patient information that consists of a Patient Profile and Patient Records. Through the Patient Profile, HCPs can register health information, set nutritional goals and send messages to patients. Patient Records provide a visualisation of the data recorded by the patients.

### Patients' list screen

| Code | Age      | Gender | Symptoms     | Reported Days | Avg Meals | Z Score BMI | Z Score Height | Z Score Weight | BMI | Energy | CH  | L   | P   | Last Checked | Last Report |
|------|----------|--------|--------------|---------------|-----------|-------------|----------------|----------------|-----|--------|-----|-----|-----|--------------|-------------|
| 0000 | 3 years  | Male   | NOT REPORTED | 0             | 0.0       |             |                |                |     | 0      | 0.0 | 0.0 | 0.0 |              | 2/6/2018    |
| 0101 | 10 years | Female | NOT REPORTED | 0             | 0.0       |             |                |                |     | 0      | 0.0 | 0.0 | 0.0 |              |             |
| 0102 | 8 years  | Male   | NOT REPORTED | 0             | 0.0       |             |                |                |     | 0      | 0.0 | 0.0 | 0.0 |              |             |
| 0201 | 18 years | Male   | NOT REPORTED | 0             | 0.0       |             |                |                |     | 0      | 0.0 | 0.0 | 0.0 |              |             |
| 0308 | 1 months | Male   | NOT REPORTED | 0             | 0.0       |             |                |                |     | 0      | 0.0 | 0.0 | 0.0 |              |             |
| 0500 | 8 years  | Female | NOT REPORTED | 0             | 0.0       |             |                |                |     | 0      | 0.0 | 0.0 | 0.0 |              | 6/5/2018    |
| 0599 | 8 years  | Female | NOT REPORTED | 0             | 0.0       |             |                |                |     | 0      | 0.0 | 0.0 | 0.0 |              | 4/17/2018   |

## Patient profile (upper part) and health profile with GI characteristics (lower part)

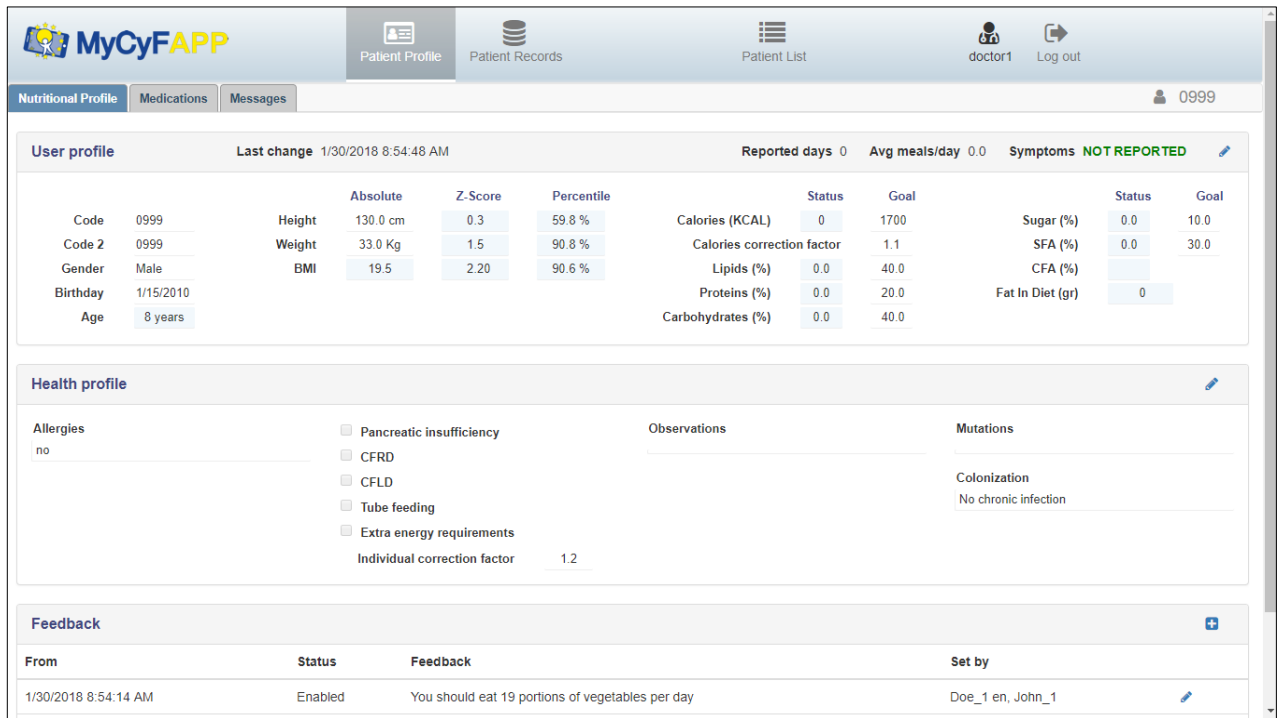

**MyCyFAPP** Patient Profile | Patient Records | Patient List | doctor1 | Log out | 0999

**Nutritional Profile** | Medications | Messages

**User profile** | Last change: 1/30/2018 8:54:48 AM | Reported days: 0 | Avg meals/day: 0.0 | Symptoms: **NOT REPORTED**

| Code                 | Height   | Absolute | Z-Score | Percentile | Status                     | Goal | Status           | Goal       |
|----------------------|----------|----------|---------|------------|----------------------------|------|------------------|------------|
| 0999                 | 130.0 cm | 130.0 cm | 0.3     | 59.8 %     | 0                          | 1700 | Sugar (%)        | 0.0   10.0 |
| Code 2: 0999         | Weight   | 33.0 Kg  | 1.5     | 90.8 %     | Calories (KCAL)            | 0    | SFA (%)          | 0.0   30.0 |
| Gender: Male         | BMI      | 19.5     | 2.20    | 90.6 %     | Calories correction factor | 1.1  | CFA (%)          |            |
| Birthdate: 1/15/2010 |          |          |         |            | Lipids (%)                 | 0.0  | Fat In Diet (gr) | 0          |
| Age: 8 years         |          |          |         |            | Proteins (%)               | 0.0  |                  |            |
|                      |          |          |         |            | Carbohydrates (%)          | 0.0  |                  |            |

**Health profile**

**Allergies:** no

**Observations:**

**Mutations:**

**Colonization:** No chronic infection

**Extra energy requirements:** Individual correction factor: 1.2

**Feedback**

| From                 | Status  | Feedback                                         | Set by           |
|----------------------|---------|--------------------------------------------------|------------------|
| 1/30/2018 8:54:14 AM | Enabled | You should eat 19 portions of vegetables per day | Doe_1 en, John_1 |

## Patient profile (upper part) and medication list (lower part)

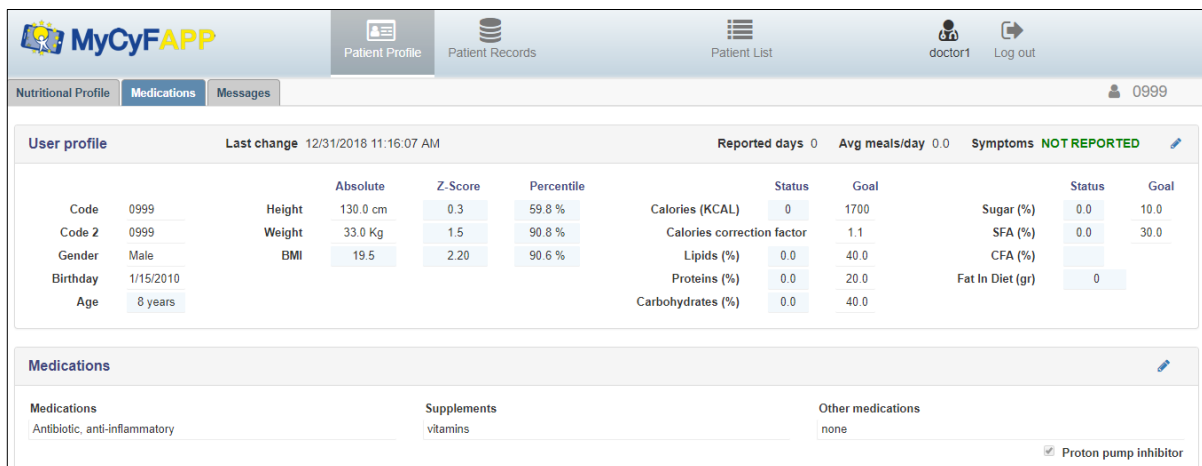

**MyCyFAPP** Patient Profile | Patient Records | Patient List | doctor1 | Log out | 0999

**Nutritional Profile** | **Medications** | Messages

**User profile** | Last change: 12/31/2018 11:16:07 AM | Reported days: 0 | Avg meals/day: 0.0 | Symptoms: **NOT REPORTED**

| Code                 | Height   | Absolute | Z-Score | Percentile | Status                     | Goal | Status           | Goal       |
|----------------------|----------|----------|---------|------------|----------------------------|------|------------------|------------|
| 0999                 | 130.0 cm | 130.0 cm | 0.3     | 59.8 %     | 0                          | 1700 | Sugar (%)        | 0.0   10.0 |
| Code 2: 0999         | Weight   | 33.0 Kg  | 1.5     | 90.8 %     | Calories (KCAL)            | 0    | SFA (%)          | 0.0   30.0 |
| Gender: Male         | BMI      | 19.5     | 2.20    | 90.6 %     | Calories correction factor | 1.1  | CFA (%)          |            |
| Birthdate: 1/15/2010 |          |          |         |            | Lipids (%)                 | 0.0  | Fat In Diet (gr) | 0          |
| Age: 8 years         |          |          |         |            | Proteins (%)               | 0.0  |                  |            |
|                      |          |          |         |            | Carbohydrates (%)          | 0.0  |                  |            |

**Medications**

**Medications:** Antibiotic, anti-inflammatory

**Supplements:** vitamins

**Other medications:** none

Proton pump inhibitor

## Patient profile (upper part) and recommendation messages (lower part)

**MyCyFAPP** Patient Profile Patient Records Patient List doctor1 Log out

Nutritional Profile Medications **Messages** 0999

**User profile** Last change 12/31/2018 11:18:01 AM Reported days 0 Avg meals/day 0.0 Symptoms **NOT REPORTED**

|                    | Absolute        | Z-Score | Percentile | Status                         | Goal | Status             | Goal |
|--------------------|-----------------|---------|------------|--------------------------------|------|--------------------|------|
| Code 0999          | Height 130.0 cm | 0.3     | 59.8 %     | Calories (KCAL) 0              | 1700 | Sugar (%) 0.0      | 10.0 |
| Code 2 0999        | Weight 33.0 Kg  | 1.5     | 90.8 %     | Calories correction factor 1.1 |      | SFA (%) 0.0        | 30.0 |
| Gender Male        | BMI 19.5        | 2.20    | 90.6 %     | Lipids (%) 0.0                 | 40.0 | CFA (%)            |      |
| Birthday 1/15/2010 |                 |         |            | Proteins (%) 0.0               | 20.0 | Fat In Diet (gr) 0 |      |
| Age 8 years        |                 |         |            | Carbohydrates (%) 0.0          | 40.0 |                    |      |

**Messages**

| Date                   | Message                                            | Educational content        | Set by           |
|------------------------|----------------------------------------------------|----------------------------|------------------|
| 12/31/2018 11:18:01 AM | Good morning! let's start the day reading about CF | CHAPTER 1: Cystic Fibrosis | Doe_1 en, John_1 |

## Patient records: nutritional intake

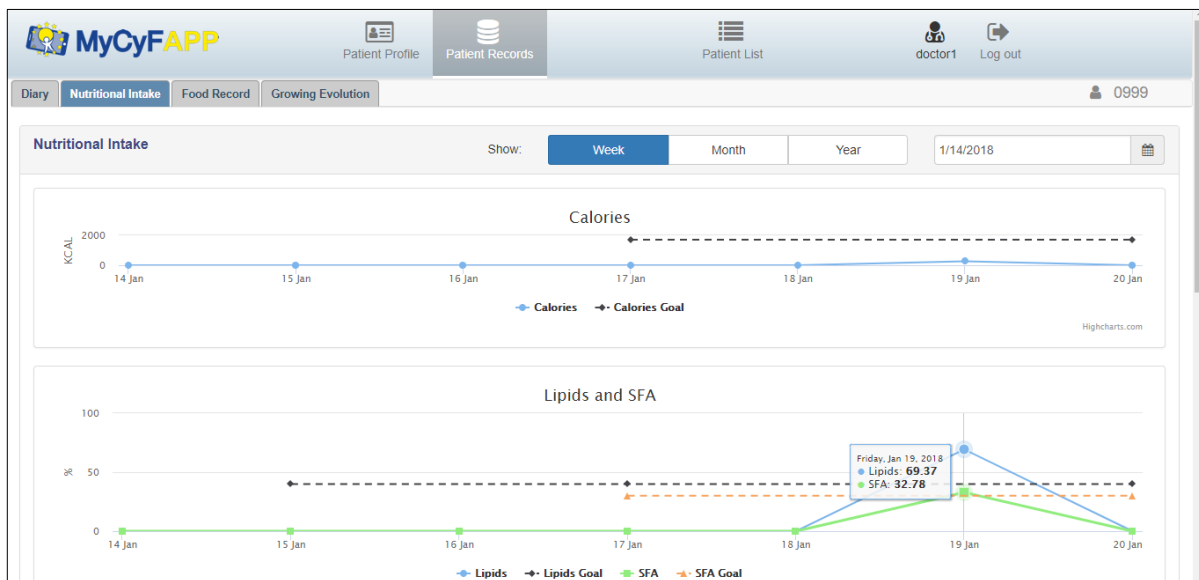

## Patient records: food records over time

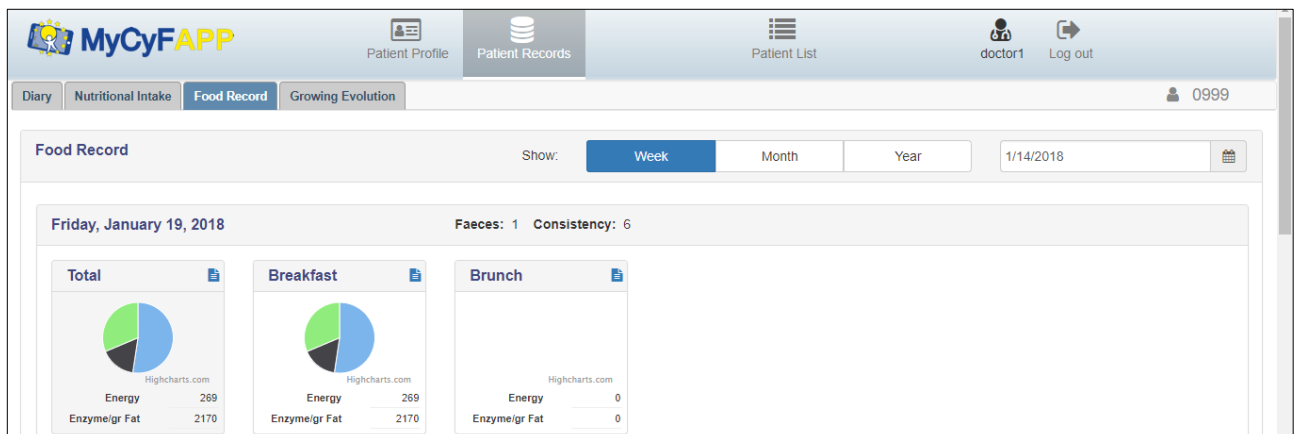

## Patient records: growth in percentile or Z-score scales

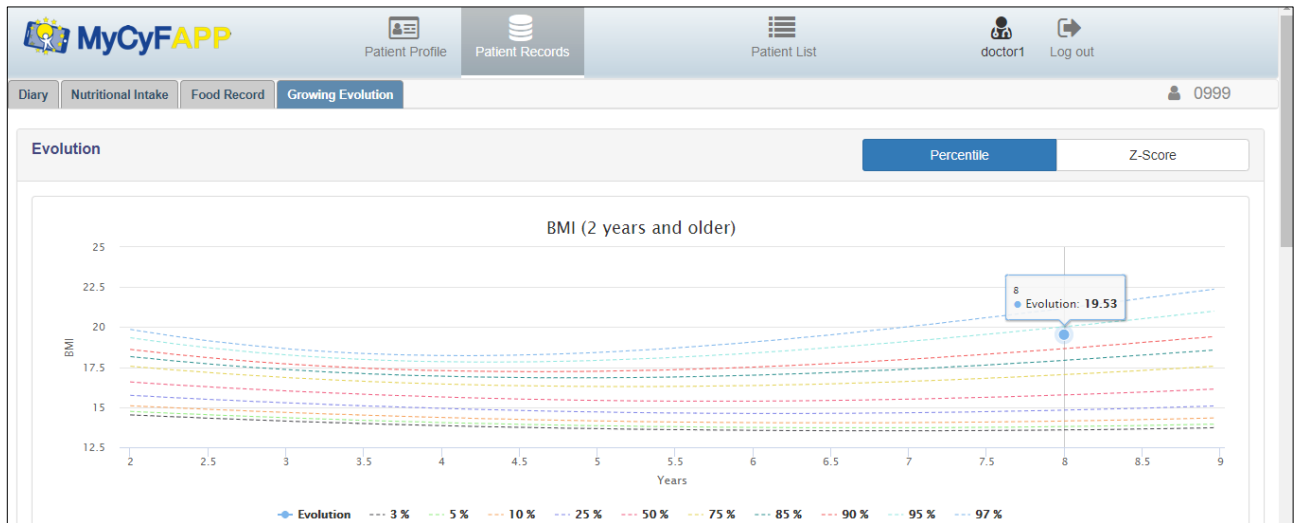

## Patient records: health diary including mood and GI symptoms

The screenshot shows the 'Diary' tab in the MyCyFAPP interface. The 'Show' dropdown is set to 'Week'. The table displays reported symptoms for the week of 1/14/2018 to 1/20/2018.

| Reported symptoms       | 1/14/2018<br>Sunday | 1/15/2018<br>Monday | 1/16/2018<br>Tuesday | 1/17/2018<br>Wednesday | 1/18/2018<br>Thursday | 1/19/2018<br>Friday | 1/20/2018<br>Saturday |
|-------------------------|---------------------|---------------------|----------------------|------------------------|-----------------------|---------------------|-----------------------|
| <b>Bowel movements:</b> |                     |                     |                      |                        |                       |                     |                       |
| Consistency:            |                     |                     |                      | 6                      |                       | 6                   |                       |
| Difficulty:             |                     |                     |                      | No                     |                       | No                  |                       |
| Pain:                   |                     |                     |                      | No                     |                       | No                  |                       |
| Consistency:            |                     |                     |                      | 3                      |                       |                     |                       |
| Difficulty:             |                     |                     |                      | No                     |                       |                     |                       |
| Pain:                   |                     |                     |                      | No                     |                       |                     |                       |
| <b>Abdominal pain:</b>  |                     |                     |                      |                        |                       |                     |                       |
| Daily frequency:        |                     |                     |                      | Once or twice          |                       | Once or twice       |                       |
