# Supplementary material for: Users’ Experiences of a Mobile Health Self-Management Approach for the Treatment of Cystic Fibrosis: Mixed Methods Study
Source: PubMed Central journal article supplement (PMC7381063; doi:10.2196/15896), 2020-07-08
Supplement: mhealth_v8i7e15896_app2.pdf [file mhealth_v8i7e15896_app2.pdf]

## Multimedia Appendix 2: Questionnaires and interview guidelines

### Questionnaires in the self-management app

#### Questionnaire 1 (after 1 week): Focus on usability and expectations

| Question                                                                                                                                                                   | Response type                   |
|----------------------------------------------------------------------------------------------------------------------------------------------------------------------------|---------------------------------|
| I find the APP easy to use.                                                                                                                                                | Five-level likert scale         |
| I find learning to use the APP easy.                                                                                                                                       | Five-level likert scale         |
| I enjoy using the app.                                                                                                                                                     | Five-level likert scale         |
| I find the following features difficult to use:<br>Today's summary; Food diary, Enzyme dose calculation; Dishes;<br>Goals; Health diary; Living with CF; Reminders; Charts | Select from list<br>(0 or more) |
| I expect that the APP will help me to find the right enzyme dose.                                                                                                          | Five-level likert scale         |
| I expect that the APP will make it easier to understand the treatment.                                                                                                     | Five-level likert scale         |
| I expect that the APP will motivate me to follow the treatment.                                                                                                            | Five-level likert scale         |

#### Questionnaire 2 (after 1 and 5 months): Focus on acceptance

| Question                                                                                                                                                                      | Response type                   |
|-------------------------------------------------------------------------------------------------------------------------------------------------------------------------------|---------------------------------|
| I enjoy using the app.                                                                                                                                                        | Five-level likert scale         |
| I find the following features particularly useful:<br>Today's summary; Food diary, Enzyme dose calculation; Dishes;<br>Goals; Health diary; Living with CF; Reminders; Charts | Select from list<br>(0 or more) |
| I miss the following features:                                                                                                                                                | Free text                       |
| The APP helps me to find the right enzyme dose.                                                                                                                               | Five-level likert scale         |
| The APP helps me to follow good eating habits.                                                                                                                                | Five-level likert scale         |
| The APP helps me to understand the treatment.                                                                                                                                 | Five-level likert scale         |
| The APP motivates me to follow my treatment.                                                                                                                                  | Five-level likert scale         |

## Interview guidelines

The following guidelines were developed:

*Interview guidelines for parents and patients (self-management app)*

*Guidelines for Health Care Professionals (self-management app)*

*Guidelines for Health Care Professionals (Professional Web Tool)*

### Interview guidelines for parents and patients (self-management app)

#### Context

- About you: your age / age of your child
- (for parents of children < 12): Was your child using the game?

#### About usage

How and when did you use the app?

- What features did you use? Why?
- How did you like the app?
- How did you like the different features? *Recall list of features*
- Did you get messages from the doctor/dietician through the app?
  - If so, what was the purpose with the messages (e.g., encouragement, advice, reminder)?
- What features should be improved? Why?
- What features did you miss?

(Only for teens) Did you use the app yourself or with your parents?

Did you use the app regularly?

In which situation? When? Where?

- When did you use the app? You can help answering giving examples:
  - At the end of the day?
  - When things happen? (e.g., at mealtime, when having a symptom, during consultation)
  - When the doctor asks you to do so?
- Where did you use the app? (e.g., at home, at school, in the bus)

## Did the dieticians or doctors help you to use the app?

### *About impact/experience*

- Overall, what was your motivation for using the app?
- Any particular situation that motivates you to use the app? (e.g., new type of food, stomach ache, question during consultation)
- Did you experience any positive or negative effect of using the app?
- Did you feel confident that you were following the treatment well? Why?
- Did the app change the way, the treatment was followed?
- What about estimating the enzyme dose?
  - Did you find it difficult before using the app? Did the app help you?
  - Do you still need to calculate after using the app for 6 months? Or do you manage it by yourself?
- What about eating habits?
- Were you worrying about food before using the app? Did the app help you to acquire good eating habits?
- Did you improve your understanding of the treatment? How?  
(For parents) Did it improve the way you explain the treatment to your child?
  - What about education materials?
  - What about self-reporting?
- How do you feel about sharing data recorded in the app with doctors?
- Did you change the way you talk to the doctor or dietician during consultations?
  - Do you use the app to remember what happened? E.g., what symptom you had.
- Did you change the way you communicate to the doctor or dietician between consultations?
- Any other effects of using the app?

### *About expectations*

- Would you like to use such an APP in the future?

## Interview guidelines for Health Care Professionals (self-management app)

### Context

- Country, name of CF Center
- Profession and position in the CF team:
- How many patients were included in the clinical trial at your center?
- How many drop outs were there? When? Why?

### General feedback of patients and of parents on the self-management app

Please try to leave your personal opinion out for the first part of the interview.

- What feedback did you get regarding the self-management app?
- Overall, do you think they liked the self-management app or didn't like the self-management app? Why?
- What did they like about the self-management app?
- What didn't they like about the self-management app?
- What problems/issues regarding the self-management app did they report during the trial?
  - Technical? Contextual? (e.g., at school, at home...) Others?
- What features did they like most? Why?
- What features did they like the least? Why?
- What did they think of the rest of the features? *Recall list of features*

### User behaviour

- Did you get the impression the self-management app was used a lot or only seldomly?
- How often do you think the self-management was used on average? Daily? Weekly? Monthly?
- Did the usage of the app change over time?
  - Were the users more interested in the self-management app in the beginning then later on in the trial? Or the other way around?
  - When did you notice the change?

### Perceived Impact / Usefulness

- What benefits of the self-management app were reported?
- What downsides of the self-management app were reported?

## Tips/ Outlook

- Did patients and parents make suggestions for changes? What were they?
- Did patients and parents make suggestions on what should stay the same?

## *Perspective of the Health Professional*

- What was your experience with the self-management app during the clinical trial?
  - What was good about the self-management app? What did you like?
  - What wasn't good about the self-management app? What didn't you like?
- What features did you like? What features didn't you like? *Recall list of features*
- Was it necessary for you to motivate patients to use the self-management?
  - If so, why do you think this external motivation was necessary?
  - If so, what motivation approach did you use?
- Did you notice an impact of the self-management app for patients and/or parents?
  - Do you think there was a learning process/knowledge increase with your patients?
  - Did the self-management app help with the interaction with parents and patients during consultations?
  - Did the self-management app help with the communication with parents and patients between consultations?
  - Did you see improvements regarding the treatment?
  - Others?
- Did you notice an impact of the self-management app for your work? Was it helpful for your work?
  - What impact did you see?
  - Did you use the app with patients and parents during consultations? Was it of help?
- What would you change about the self-management app?
- What should stay the same?

## Guidelines for Health Care Professionals (Professional Web Tool)

### *Context*

- Country, name of CF Center
- Profession and position in the CF team:
- How many patients were included in the clinical trial at your center?
- How many drop outs were there? When? Why?

### *General feedback on the PWT*

- What do you think of the PWT after using it during the clinical trial?
- Overall, did you like using the PWT?
- What did you like about the PWT?
- What didn't you like about the PWT?
- Was there any inconsistency in the system?
- Was it well linked with the self-management app?
- Did you find PWT easy or cumbersome to use? Did you have any kind of problems/issues regarding the PWT during the clinical trial?
- What features did you like the most?
- What features did you like the least?
- What do you think of the rest of the features?

### *Behaviour*

- How often did you use PWT normally? Almost never? Once per week? Twice per week?
- Did your usage of the PWT change over time?
  - Did you use it more often in the beginning then later on in the trial? Or the other way around?
  - When did your usage change?
- When did you use PWT?
  - Before the consultation? During the consultation? After the consultation?

### *Perceived impact/ Usefulness*

- What benefits of the PWT did you noticed?
- What downsides of the PWT did you notice?
- Did you notice an impact of PWT for your interaction with patients and/or parents?

- Did PWT help with the interaction with parents and patients during consultations?
- Did PWT help with the communication with parents and patients between consultations?
- Did you see improvements regarding the treatment? Was it more personalized?
- Did you think PWT has helped to provide better service to parents and patients?
- Do you know better knowledge about the patients?
- Others?
- Did you notice a specific impact of the PWT for patients and/ or parents?
- Did you notice a specific impact of the PWT for your work?
  - Was it helpful for your work?
  - What impact did you see?
  - Did you feel confident of using it?
  - Did you integrate the tool in consultations? Was it of help?
- Any other effect you noticed while using PWT?

**Tips**

- Do you have suggestions for changes? What are they?
- Do you have suggestions on what should stay the same?
- Would you like to use PWT in the future?
